# Supplementary material for: Effect of guanidinium chloride in eliminating O2− electron extraction barrier on a SnO2 surface to enhance the efficiency of perovskite solar cells
Source: Royal Society of Chemistry journal article supplement (doi:10.1039/d0ra01501f), 2020-01-01
Supplement: d0ra01501f1.pdf [file d0ra01501f1.pdf]

## Electronic Supporting Information

### Effect of guanidinium chloride in eliminating $O_2^-$ electron extraction barrier on $SnO_2$ surface to enhance the efficiency of perovskite solar cells

Miao Yu <sup>a,b</sup>, Lijia Chen <sup>c</sup>, Guannan Li <sup>a,b</sup>, Cunyun Xu <sup>a,b</sup>, Chuanyao Luo <sup>a,b</sup>, Meng Wang <sup>a,b</sup>, Gang Wang <sup>a,b</sup>, Yanqing Yao <sup>a,b</sup>, Liping Liao <sup>a,b</sup>, Sam Zhang and Qunliang Song <sup>a,b</sup>\*

<sup>a</sup>Institute for Clean Energy and Advanced Materials, School of Materials and Energy, Southwest University, Chongqing 400715, P. R. China

<sup>b</sup>Chongqing Key Laboratory for Advanced Materials and Technologies of Clean Energy, Chongqing 400715, P. R. China

<sup>c</sup>College of Physics and Electronics Engineering, Chongqing Normal University, Chongqing 401331, P. R. China

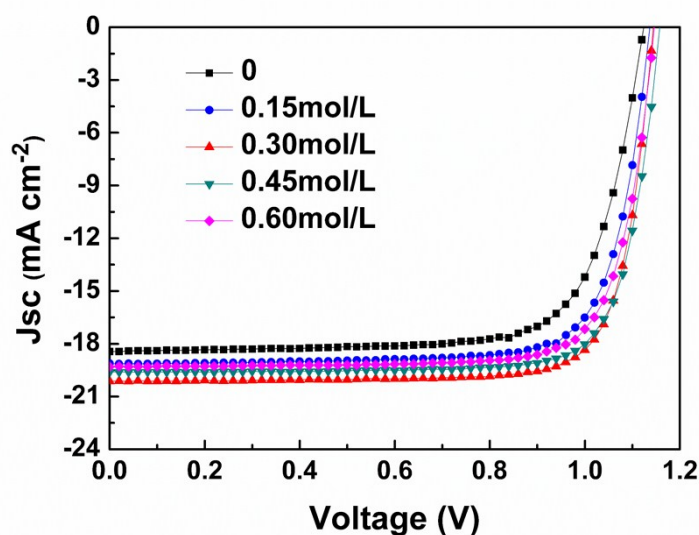

**Figure S1.** The  $J$ - $V$  characteristics of devices with different GA-modification concentrations.

**Table S1.** The performances of devices with different GA-modification concentrations.

| C(mmol/L) | $V_{OC}$ (V)   | $J_{sc}$ ( $mA\cdot cm^2$ ) | FF(%)           | PCE(%)          |
|-----------|----------------|-----------------------------|-----------------|-----------------|
| 0         | $1.12\pm 0.01$ | $18.04\pm 0.60$             | $72.25\pm 3.20$ | $15.25\pm 1.25$ |
| 0.15      | $1.13\pm 0.01$ | $19.10\pm 0.30$             | $76.50\pm 2.40$ | $16.40\pm 0.50$ |
| 0.30      | $1.14\pm 0.01$ | $20.00\pm 0.25$             | $79.66\pm 1.25$ | $18.00\pm 0.50$ |
| 0.45      | $1.15\pm 0.01$ | $19.42\pm 0.35$             | $77.80\pm 1.50$ | $17.60\pm 0.45$ |
| 0.60      | $1.14\pm 0.01$ | $19.13\pm 0.30$             | $76.88\pm 1.70$ | $17.00\pm 0.45$ |

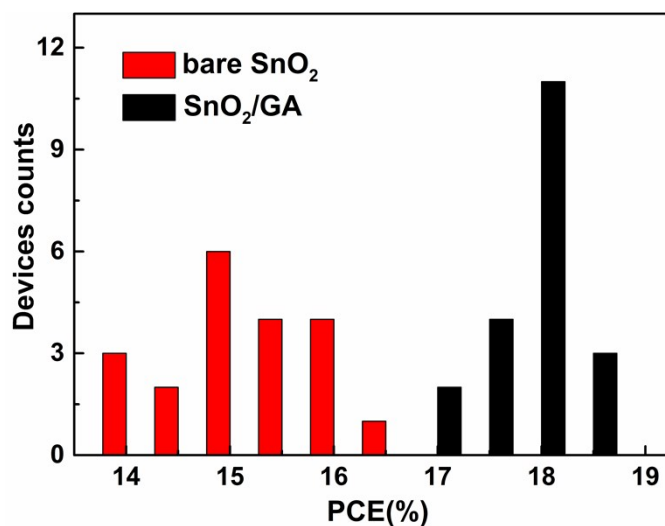

**Figure S2.** The PCE histogram of 20 bare SnO<sub>2</sub> devices and 20 SnO<sub>2</sub>/GA devices

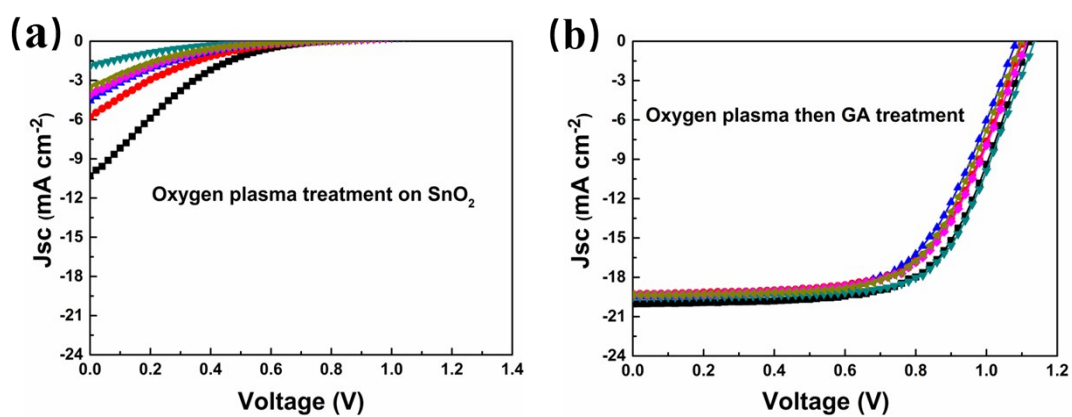

**Figure S3.** The J-V characteristics of 6 independent SnO<sub>2</sub>/oxygen-plasma devices and 6 independent SnO<sub>2</sub>/oxygen-plasma/GA devices.

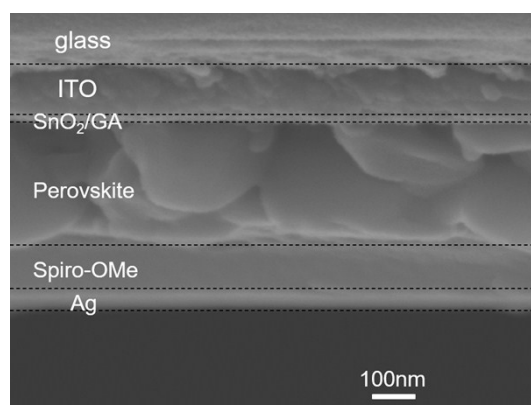

**Figure S4.** The cross-sectional SEM images of perovskite films on SnO<sub>2</sub>/GA

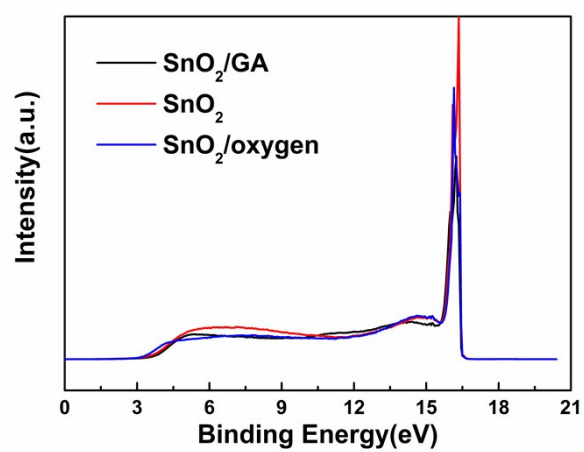

**Figure S5.** The full UPS spectra of the bare SnO<sub>2</sub>, the SnO<sub>2</sub>/GA and SnO<sub>2</sub>/oxygen film.
